# Supplementary material for: Attention or Sentiment: How Social Media React to ESG?
Source: Atypon-hosted journal article supplement (doi:10.1287/isre.2022.0251), 2025-10-15
Supplement: isre.2022.0251.sm1.pdf [file isre.2022.0251.sm1.pdf]

— Online Appendix —

**Attention or Sentiment: How Social Media React to ESG?**

**Appendix I. The value of CSR and ESG**

The value of CSR and ESG is widely investigated in a variety of domains such as marketing, strategy, finance, accounting, and also IS. CSR and ESG are found to affect customers, investors, and firms, etc.

According to a report by Allianz, consumers expect to obtain more than just products and services from their providers (Allianz 2018). More specifically, they increasingly demand firms to engage in ESG activities. As a result, most consumers believe that firms paying more attention to ESG issues have better long-term prospects. Thus, CSR can impact the way consumers evaluate a company's products or services, confirming that doing good can help firms do well (Chernev and Blair 2015). Furthermore, some factors are found to have influence on the relationship between CSR and consumers' responses, e.g., brand concepts (Torelli et al. 2012). Besides, Sen and Bhattacharya (2001) investigate the conditions, circumstances and population under which specific CSR activities will have positive impact, and they find that under certain circumstances, CSR initiatives can reduce consumers' purchase intentions.

Shareholders are also sensitive to firm's CSR or ESG activities. Flammer (2013) finds that firms that act responsibly towards the environment experience a significant increase in stock price, while those that act irresponsibly encounter a significant decrease. When experiencing negative events, firms' CSR activities can mitigate the decrease in shareholder value (Godfrey et al. 2009). Ioannou and Serafeim (2015) investigate the influence of CSR ratings on sell-side analysts' predictions about firms' future financial performance and find that analysts initially produce pessimistic recommendations, perceiving CSR as a cost; but gradually they become more optimistically on these firms over time. During the 2008-2009 financial crisis, companies with high CSR ratings achieved higher stock returns than those with low CSR performance, further

supporting the argument that CSR has a positive impact on firm value (Lins et al. 2017). CSR strategies can influence firms' access to capital markets by reducing capital constraints for companies with superior CSR performance (Cheng et al. 2014). Homburg et al. (2013) confirm the helpfulness of supplier firms' CSR engagement in generating positive customer outcomes, such as customers' trust and loyalty, in organizational business relationships. Du et al. (2011) find that CSR can be a competitive weapon for challengers against market leaders. Specifically, challengers who engage in CSR activities can achieve more positive attitudes and behaviors from consumers. Ramchander et al. (2012) find that stakeholder-related CSR announcements produce a positive stock market response for focal firms and a negative feedback for their rival firms. CSR activities can be divided into internal and external ones, and Hawn and Ioannou (2016) find that they jointly have a significantly positive association with firm market value. Flammer (2015) utilize a regression discontinuity approach to confirm the causal impact of CSR on a company's financial performance and discover that the implementation of comprehensive CSR strategies leads to a significant increase in firm value.

CSR can impact firm value, but the relationship holds only under certain conditions. Servaes and Tamayo (2013) discover that for companies with high customer awareness, the relationship between CSR and firm value is positive, but for firms with low customer awareness insignificant or even negative. Luo et al. (2015) posits that analyst recommendations serve as a mediator between CSR and firm financial performance. Furthermore, it is found that customer satisfaction also acts as a mediator between CSR and firm market value (Luo and Bhattacharya 2006). Mishra and Modi (2016) investigate the supplementary role of marketing capability in the relationship between CSR and shareholder wealth, and find its significant interaction effect with firms' CSR efforts. Another study by Luo and Bhattacharya (2009) demonstrates that CSR can reduce firms' idiosyncratic risk, with even greater risk reduction observed for companies with more advertising investment; however, simultaneous investment in advertising and R&D with the attendance of CSR results in higher idiosyncratic risk.

Table A1 summarizes the related works in comparison with our own.

**Table A1. Summary of Related Literature**

| Study                       | Corporate governance <sup>a</sup> | Focus       | Method                          | Data source <sup>b</sup>                           | Key findings                                                                                                                                                                                                                                                                    |
|-----------------------------|-----------------------------------|-------------|---------------------------------|----------------------------------------------------|---------------------------------------------------------------------------------------------------------------------------------------------------------------------------------------------------------------------------------------------------------------------------------|
| Flammer (2013)              | N                                 | Shareholder | Event study                     | Corporate announcement news                        | It echoes the perspective of considering the environment as a resource and posits that its worth is contingent upon both internal and external moderators.                                                                                                                      |
| Chernev and Blair (2015)    | N                                 | Consumer    | ANOVA                           | Experiments                                        | A firm's socially responsible behavior can change consumers' perception of the firm.                                                                                                                                                                                            |
| Torelli et al. (2012)       | N                                 | Consumer    | ANOVA                           | Experiments                                        | Brand concepts affect consumers' responses to firms' CSR activities.                                                                                                                                                                                                            |
| Homburg et al. (2013)       | N                                 | Consumer    | Structural equation model (SEM) | Survey                                             | It confirms the helpfulness of supplier firms' CSR engagement in generating positive customer outcomes in organizational business relationships.                                                                                                                                |
| Luo and Bhattacharya (2006) | N                                 | Consumer    | Structural equation model (SEM) | Fortune America's Most Admired Corporations (FAMA) | In the context of CSR and firm market value, customer satisfaction plays a partial mediating role; corporate abilities serve as a moderating factor that impacts the financial returns generated by CSR initiatives; customer satisfaction mediates the moderated relationship. |
| Mishra and Modi (2016)      | N                                 | Shareholder | Seemingly unrelated             | KLD                                                | It finds that the relationship between CSR and                                                                                                                                                                                                                                  |

|                                   |   |             |                                               |                                          |                                                                                                                                                                                                                                                                   |
|-----------------------------------|---|-------------|-----------------------------------------------|------------------------------------------|-------------------------------------------------------------------------------------------------------------------------------------------------------------------------------------------------------------------------------------------------------------------|
|                                   |   |             | regression<br>(SUR)                           |                                          | shareholder wealth is<br>complemented by the role<br>of marketing capability.                                                                                                                                                                                     |
| Sen and<br>Bhattacharya<br>(2001) | N | Consumer    | ANOVA                                         | Experiments                              | Consumer purchase<br>intention can be decreased<br>by CSR initiatives under<br>certain circumstances.                                                                                                                                                             |
| Du et al.<br>(2011)               | N | Firm        | Qualitative<br>study,<br>quasi-experi<br>ment | Transcripts,<br>survey                   | CSR can serve as a<br>competitive weapon for<br>challengers against market<br>leaders.                                                                                                                                                                            |
| Flammer<br>(2015)                 | N | Shareholder | Regression<br>Discontinuit<br>y               | RiskMetrics<br>and<br>SharkRepelle<br>nt | The implementation of CSR<br>initiatives leads to a<br>significant enhancement in<br>the company's value.                                                                                                                                                         |
| Servaes and<br>Tamayo<br>(2013)   | N | Consumer    | OLS<br>regression                             | KLD                                      | Among firms with high<br>customer awareness, there<br>is a positive correlation<br>between CSR and firm<br>value. However, for firms<br>with low customer<br>awareness, the relationship<br>between CSR and firm<br>value is either negative or<br>insignificant. |
| Cheng et al.<br>(2014)            | Y | Firm        | Econometri<br>c models                        | Thomson<br>Reuters<br>(ASSET4)           | CSR strategies can affect<br>firms' ability in accessing<br>finance in capital markets in<br>that firms with superior<br>CSR performance<br>encounter fewer capital<br>constraints.                                                                               |
| Godfrey et al.<br>(2009)          | Y | Shareholder | Event study                                   | KLD                                      | When experiencing<br>negative events, firms' CSR<br>activities can mitigate the<br>decrease in shareholder<br>value.                                                                                                                                              |
| Hawn and<br>Ioannou               | Y | Shareholder | Econometri<br>c models                        | ASSET4                                   | Internal and external CSR<br>activities jointly exhibit a                                                                                                                                                                                                         |

|                             |   |               |                                |                              |                                                                                                                                                                                                                                                         |
|-----------------------------|---|---------------|--------------------------------|------------------------------|---------------------------------------------------------------------------------------------------------------------------------------------------------------------------------------------------------------------------------------------------------|
| (2016)                      |   |               |                                |                              | significantly positive correlation with firm value.                                                                                                                                                                                                     |
| Ioannou and Serafeim (2015) | Y | Stock analyst | Panel regression               | KLD                          | Sell-side analysts make pessimistic recommendations with perceiving CSR as an agency cost in the early stage, then gradually become more optimistically over time.                                                                                      |
| Luo et al. (2015)           | Y | Stock analyst | Two-stage least squares (2SLS) | KLD                          | The relationship between corporate social performance and firm financial performance is mediated by stock analyst recommendations.                                                                                                                      |
| Ramchander et al. (2012)    | Y | Shareholder   | Event study                    | KLD                          | The announcement of stakeholder-related CSR initiatives results in a positive stock price reaction for the focal firms and a negative stock price reaction for their competitors, and the opposite response is observed for CSR announcements deletion. |
| Lins et al. (2017)          | Y | Shareholder   | Econometric models             | MSCI (formerly known as KLD) | During the 2008-2009 global financial crisis, high-CSR firms achieved higher stock returns compared to those with low CSR performance, thereby confirming the positive impact of CSR on firm value.                                                     |
| Luo and Bhattacharya (2009) | N | Firm          | Econometric models             | Fortune's MAC                | CSR can mitigate firms' idiosyncratic risk, particularly for those with                                                                                                                                                                                 |

|                      |   |                     |                                                                 |                                     |                                                                                                                                                                                                                                                                                                                  |
|----------------------|---|---------------------|-----------------------------------------------------------------|-------------------------------------|------------------------------------------------------------------------------------------------------------------------------------------------------------------------------------------------------------------------------------------------------------------------------------------------------------------|
|                      |   |                     |                                                                 |                                     | higher advertising investment; however, the simultaneous enhancement of advertising and R&D resources in conjunction with corporate social performance may result in increased risk.                                                                                                                             |
| D'Arcy et al. (2020) | Y | Firm                | Panel regression                                                | KLD                                 | A positive CSR performance record which is peripheral to a firm's core activities causes an elevated possibility of data breach, but firms with poor CSR records do not have a higher possibility to experience data breach.                                                                                     |
| This study           | Y | Individual investor | Panel regression; Event study; Instrumental variable regression | Sustainalytics ; Refinitiv; RepRisk | A firm's ESG performance increase is associated with its subsequent investor attention increase; The effect of ESG on investor attention holds for both ESG downgrade and upgrade events; The positive association between ESG performance and investor attention is driven by environmental and social factors. |

Notes. <sup>a</sup>: N means that the study does not consider corporate governance factor, and Y otherwise; <sup>b</sup>: the data source is summarized just for CSR or ESG data source.

## Appendix II. Data Collection

### (1) Investor-generated content from Seeking Alpha

For our study, we use the S&P 500 firms as our research sample and acquire

investor-generated content data from Seeking Alpha, which is one of the most popular OICs all over the world. As postings published on Seeking Alpha are long articles reviewed by editors of the platform, so it takes authors substantial effort to compose an article. Consequently, compared with authors on platforms allowing users to publish short postings such as StockTwits, authors on Seeking Alpha publish much fewer articles. Therefore, there are not too many articles related to a firm or stock, especially for small-cap ones. At the same time, ESG is considerably more visible and accurately measured for big firms. Hence, we choose investor-generated articles about S&P 500 firms for our study.

## **(2) Financial data from Compustat**

The financial data for each firm is retrieved from Compustat, a repository of financial information for publicly traded companies worldwide. It is worth noting that, as total assets and other financial indicators of firms used for our study are released on a quarterly basis instead of a monthly basis, following the data-matching scheme in line with Luo (2009), we postulate that the monthly financial indicators of a company are equivalent to the quarterly values for the months encompassed within the quarterly reporting period. At last, quarterly reported total assets, operating income, intangible assets, and long-term debt are obtained from Compustat.

## **(3) Stock market data from CRSP**

In order to calculate *Beta*, *Momentum*, and *Volatility* of a stock, we need to obtain its historical return data. These data are obtained from the CRSP database, which is a database for stock trading information for listed companies around the world.

## **(4) ESG rating scores from Sustainalytics**

We obtain ESG performance scores for each company from Sustainalytics, which is a global leader in providing ESG performance data (Sustainalytics 2020). In addition to an overall ESG score, there are also three sub-dimensional scores for each firm in each month: environmental, social, and governance scores. For the purpose of this research, we primarily consider the overall ESG scores in our main analysis, whereas investigate the three sub-dimensional scores in the

additional analyses. We obtain the ESG scores and the average ESG scores for its industry for each company monthly for the period from January 2014 (some firms started later because of data missing) to December 2019.

After we delete firms which have never been discussed in Seeking Alpha and those whose ESG scores, financial data, or stock return data are missing, 429 firm are eventually included in our study.

### Appendix III. Variables and Measurement

**Table A2. Variable Descriptions**

| Type                 | Variable                      | Description                                                                                                                                                                            |
|----------------------|-------------------------------|----------------------------------------------------------------------------------------------------------------------------------------------------------------------------------------|
| Dependent variable   | $Attention_{it}$              | The logarithm of the total number of articles published about Firm $i$ published in Month $t$ .                                                                                        |
|                      | $Sentiment_{it}$              | The average sentiment of articles about Firm $i$ published in Month $t$ .                                                                                                              |
| Independent variable | $ESG_{i,t-1}$                 | Measured by the ESG score for Firm $i$ in Month $t-1$ , which is obtained from Sustainalytics.                                                                                         |
| Control variables    | $Firm\_size_{i,t-1}$          | The logarithm of the total assets of Firm $i$ in Month $t-1$ .                                                                                                                         |
|                      | $ROA_{i,t-1}$                 | Measured as the ratio of operating income to total assets for Firm $i$ in Month $t-1$ .                                                                                                |
|                      | $Intangible\_assets_{i,t-1}$  | The ratio between intangible assets value and total assets value for Firm $i$ in Month $t-1$ .                                                                                         |
|                      | $Financial\_leverage_{i,t-1}$ | The ratio between long-term debt to total assets for Firm $i$ in Month $t-1$ .                                                                                                         |
|                      | $Beta_{i,t-1}$                | The market beta estimated using monthly returns from 60 months prior to the focal month ( $t-60$ ) to one month prior to the focal month ( $t-1$ ).                                    |
|                      | $Momentum_{i,t-1}$            | Estimated using the cumulative returns from 24 months prior to the focal month ( $t-24$ ) to one month prior to the focal month ( $t-1$ ).                                             |
|                      | $Volatility_{i,t-1}$          | The monthly standard deviation of daily returns, calculated based on data from the 12 months prior to the focal month ( $t-12$ ) through one month prior to the focal month ( $t-1$ ). |
|                      | $Industry\ FE$<br>$Month\ FE$ | The fixed effects of industry a firm belongs to.<br>The fixed effects of month when an article is published.                                                                           |

## Appendix IV. Results for Robustness Checks

**Table A3. Relationship Between ESG and Social Media Attention for Different Time Windows**

| Variable                      | Model 1<br>( $t+1$ )    | Model 2<br>( $t+2$ )    | Model 3<br>( $t+3$ )    |
|-------------------------------|-------------------------|-------------------------|-------------------------|
| $ESG_{i,t-1}$                 | <b>0.006(0.001)</b> *** | <b>0.006(0.001)</b> *** | <b>0.006(0.001)</b> *** |
| $Firm\_size_{i,t-1}$          | 0.337(0.013)***         | 0.337(0.013)***         | 0.336(0.013)***         |
| $ROA_{i,t-1}$                 | 4.097(0.521)***         | 4.281(0.516)***         | 4.136(0.534)***         |
| $Intangible\_assets_{i,t-1}$  | -0.493(0.049)***        | -0.490(0.049)***        | -0.491(0.049)***        |
| $Financial\_leverage_{i,t-1}$ | -0.181(0.038)***        | -0.179(0.038)***        | -0.161(0.039)***        |
| $Beta_{i,t-1}$                | -0.149(0.020)***        | -0.146(0.020)***        | -0.147(0.020)***        |
| $Momentum_{i,t-1}$            | 0.076(0.023)***         | 0.080(0.022)***         | 0.097(0.022)***         |
| $Volatility_{i,t-1}$          | 15.137(2.160)***        | 14.785(2.175)***        | 14.276(2.183)***        |
| <i>Intercept</i>              | -2.993(0.136)***        | -2.994(0.135)***        | -2.977(0.136)***        |
| <i>Industry FE</i>            | YES                     | YES                     | YES                     |
| <i>Month FE</i>               | YES                     | YES                     | YES                     |
| Cluster SE                    | <i>Industry-Month</i>   | <i>Industry-Month</i>   | <i>Industry-Month</i>   |
| Obs.                          | 26,281                  | 25,819                  | 25,369                  |
| $R^2$                         | 0.4020                  | 0.4027                  | 0.4023                  |

Notes. Robust standard errors clustered at industry-month level are reported in parentheses; \* :  $p < 0.05$ , \*\* :  $p < 0.01$ , \*\*\* :  $p < 0.005$ .

**Table A4. Relationship Between ESG and Social Media Sentiment for Different Time Windows**

| Variable                      | Model 1<br>( $t+1$ ) | Model 2<br>( $t+2$ ) | Model 3<br>( $t+3$ ) |
|-------------------------------|----------------------|----------------------|----------------------|
| $ESG_{i,t-1}$                 | -0.001(0.001)        | -0.001(0.001)        | -0.001(0.001)        |
| $Firm\_size_{i,t-1}$          | -0.066(0.006)***     | -0.066(0.006)***     | -0.064(0.006)***     |
| $ROA_{i,t-1}$                 | 0.931(0.266)***      | 1.073(0.263)***      | 1.365(0.271)***      |
| $Intangible\_assets_{i,t-1}$  | 0.232(0.037)***      | 0.227(0.037)***      | 0.232(0.037)***      |
| $Financial\_leverage_{i,t-1}$ | -0.078(0.033)*       | -0.081(0.034)*       | -0.088(0.035)*       |
| $Beta_{i,t-1}$                | 0.041(0.017)*        | 0.033(0.017)         | 0.031(0.017)         |
| $Momentum_{i,t-1}$            | 0.196(0.020)***      | 0.163(0.020)***      | 0.137(0.020)***      |
| $Volatility_{i,t-1}$          | -19.595(1.338)***    | -18.572(1.399)***    | -16.870(1.410)***    |
| <i>Intercept</i>              | -0.922(0.088)***     | -0.928(0.091)***     | -0.976(0.092)***     |
| <i>Industry FE</i>            | YES                  | YES                  | YES                  |

| <i>Month FE</i> | YES                   | YES                   | YES                   |
|-----------------|-----------------------|-----------------------|-----------------------|
| Cluster SE      | <i>Industry-Month</i> | <i>Industry-Month</i> | <i>Industry-Month</i> |
| Obs.            | 13,868                | 13,649                | 13,429                |
| $R^2$           | 0.1213                | 0.1188                | 0.1151                |

*Notes.* Robust standard errors clustered at industry-month level are reported in parentheses; \* :  $p < 0.05$ , \*\* :  $p < 0.01$ , \*\*\* :  $p < 0.005$ ; To make ESG's coefficients more interpretable, the dependent variable is magnified 100 times.

**Table A5. Relationship Between ESG and Social Media Sentiment (Filling Missing Values)**

| Variable                      | Filling Method 1      | Filling Method 2      | Filling Method 3      |
|-------------------------------|-----------------------|-----------------------|-----------------------|
| $ESG_{i,t-1}$                 | -0.0001(0.0004)       | -0.0003(0.0004)       | -0.0009(0.0006)       |
| $Firm\_size_{i,t-1}$          | -0.032(0.004)***      | -0.028(0.004)***      | -0.051(0.005)***      |
| $ROA_{i,t-1}$                 | 0.394(0.141)**        | 0.526(0.147)***       | 0.408(0.191)*         |
| $Intangible\_assets_{i,t-1}$  | 0.084(0.018)***       | 0.103(0.018)***       | 0.166(0.026)***       |
| $Financial\_leverage_{i,t-1}$ | -0.094(0.016)***      | -0.079(0.016)***      | -0.087(0.018)***      |
| $Beta_{i,t-1}$                | 0.033(0.010)***       | 0.021(0.009)*         | 0.031(0.013)*         |
| $Momentum_{i,t-1}$            | 0.158(0.012)***       | 0.124(0.012)***       | 0.135(0.012)***       |
| $Volatility_{i,t-1}$          | -12.959(0.878)***     | -10.180(0.856)***     | -15.331(0.885)***     |
| <i>Intercept</i>              | -1.251(0.054)***      | -1.291(0.054)***      | -1.042(0.059)***      |
| <i>Industry FE</i>            | YES                   | YES                   | YES                   |
| <i>Month FE</i>               | YES                   | YES                   | YES                   |
| Cluster SE                    | <i>Industry-Month</i> | <i>Industry-Month</i> | <i>Industry-Month</i> |
| Obs.                          | 26,281                | 26,281                | 26,281                |
| $R^2$                         | 0.0783                | 0.0668                | 0.1316                |

*Notes.* Robust standard errors clustered at industry-month level are reported in parentheses; \* :  $p < 0.05$ , \*\* :  $p < 0.01$ , \*\*\* :  $p < 0.005$ ; To make ESG's coefficient more interpretable, sentiment is magnified 100 times.

## Appendix V. Tree Diagrams for Drivers of ESG Upgrades/Downgrades

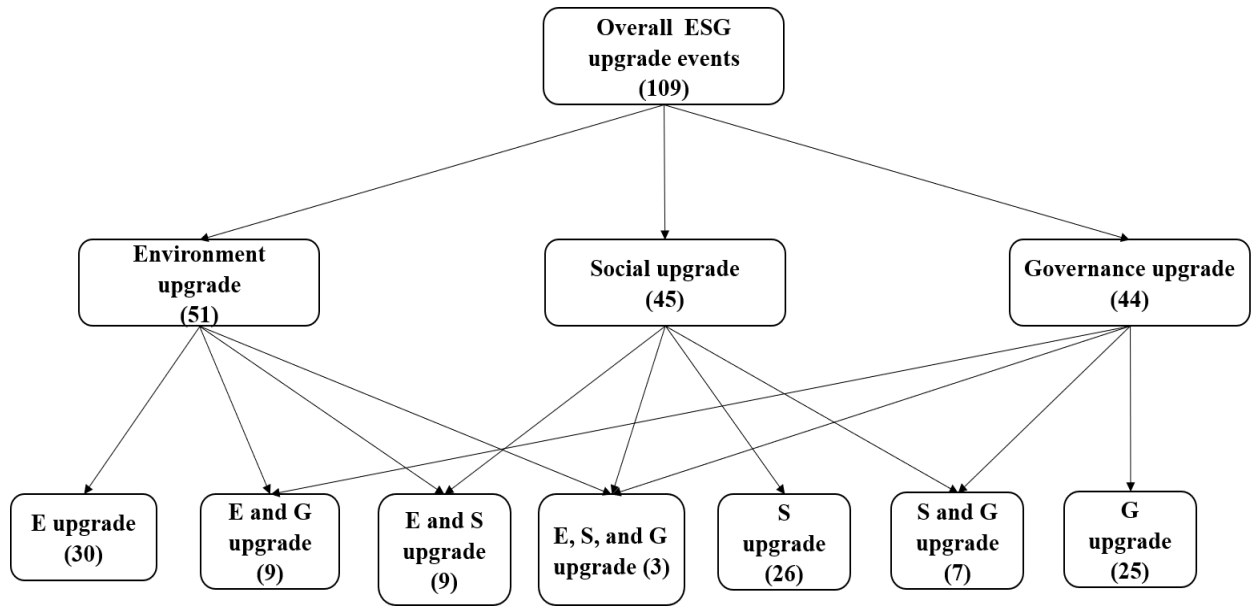

**Figure A1. Tree Diagrams for Drivers of ESG Upgrades**

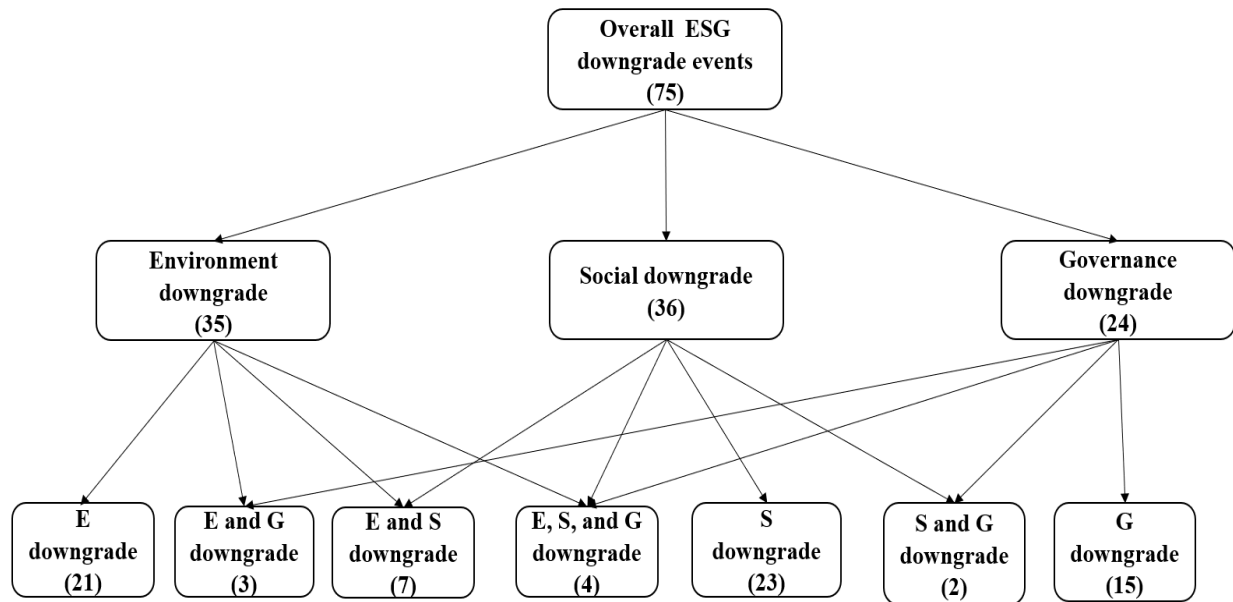

**Figure A2. Tree Diagrams for Drivers of ESG Downgrades**

## References

- Allianz (2018) ESG investor sentiment study. Report, Allianz, Minneapolis, MN.  
 Cheng B, Ioannou I, Serafeim G (2014) Corporate social responsibility and access to finance.

- Strategic Management Journal* 35(1):1-23.
- Chernev A, Blair S (2015) Doing well by doing good: The benevolent halo of corporate social responsibility. *Journal of Consumer Research* 41(6):1412-1425.
- D'Arcy J, Adjerid I, Angst CM, Glavas A (2020) Too good to be true: Firm social performance and the risk of data breach. *Information Systems Research* 31(4):1200-1223.
- Du S, Bhattacharya CB, Sen S (2011) Corporate social responsibility and competitive advantage: Overcoming the trust barrier. *Management Science* 57(9):1528-1545.
- Flammer C (2013) Corporate social responsibility and shareholder reaction: The environmental awareness of investors. *Academy of Management Journal* 56(3):758-781.
- Flammer C (2015) Does corporate social responsibility lead to superior financial performance? A regression discontinuity approach. *Management Science* 61(11):2549-2568.
- Godfrey PC, Merrill CB, Hansen JM (2009) The relationship between corporate social responsibility and shareholder value: An empirical test of the risk management hypothesis. *Strategic Management Journal* 30(4):425-445.
- Hawn O, Ioannou I (2016) Mind the gap: The interplay between external and internal actions in the case of corporate social responsibility. *Strategic Management Journal* 37(13):2569-2588.
- Homburg C, Stierl M, Bornemann T (2013) Corporate social responsibility in business-to-business markets: How organizational customers account for supplier corporate social responsibility engagement. *Journal of Marketing* 77(6):54-72.
- Ioannou I, Serafeim G (2015) The impact of corporate social responsibility on investment recommendations: Analysts' perceptions and shifting institutional logics. *Strategic Management Journal* 36(7):1053-1081.
- Lins KV, Servaes H, Tamayo ANE (2017) Social capital, trust, and firm performance: The value of corporate social responsibility during the financial crisis. *The Journal of Finance* 72(4):1785-1824.
- Luo X (2009) Quantifying the long-term impact of negative word of mouth on cash flows and stock prices. *Marketing Science* 28(1):148-165.
- Luo X, Bhattacharya CB (2006) Corporate social responsibility, customer satisfaction, and market value. *Journal of Marketing* 70(4):1-18.
- Luo X, Bhattacharya CB (2009) The debate over doing good: Corporate social performance, strategic marketing levers, and firm-idiosyncratic risk. *Journal of Marketing* 73(6):198-213.
- Luo X, Wang H, Raithel S, Zheng Q (2015) Corporate social performance, analyst stock recommendations, and firm future returns. *Strategic Management Journal* 36(1):123-136.
- Mishra S, Modi SB (2016) Corporate social responsibility and shareholder wealth: The role of marketing capability. *Journal of Marketing* 80(1):26-46.
- Ramchander S, Schwebach RG, Staking K (2012) The informational relevance of corporate social responsibility: Evidence from DS400 index reconstitutions. *Strategic Management Journal* 33(3):303-314.

Sen S, Bhattacharya CB (2001) Does doing good always lead to doing better? Consumer reactions to corporate social responsibility. *Journal of Marketing Research* 38(2):225-243.

Servaes H, Tamayo A (2013) The impact of corporate social responsibility on firm value: The role of customer awareness. *Management Science* 59(5):1045-1061.

Sustainalytics. Who we are. Accessed June 1, 2021, <https://www.sustainalytics.com/about-us>.

Torelli CJ, Monga AB, Kaikati AM (2012) Doing poorly by doing good: Corporate social responsibility and brand concepts. *Journal of Consumer Research* 38(5):948-963.
